# Supplementary material for: Understanding how physicochemical features from steam exploded wood affect enzymatic saccharification efficiency for bioethanol production
Source: Royal Society of Chemistry journal article supplement (doi:10.1039/d5se00535c), 2025-01-01
Supplement: d5se00535c2.xlsx [file d5se00535c2.xlsx]

## Sheet: bdd
Species	Temperature	Time	CSF	Mean_particle_length (µm)	Enzymatic_saccharification_yield (%)	Glucose_hydrolysis_yield (%)	Mannose_hydrolysis_yield (%)	β-O-4_linkages (%)
Oak					8.04823	7.84254	14.639	57
Oak	190	5	3.35	2546.31	25.3995	25.4088	24.977	52
Oak	197.5	5	3.57	537.543	32.2365	32.3764	24.7485	-
Oak	190	12.5	3.75	465.347	38.6509	38.8381	28.4904	-
Oak	205	5	3.79	520.927	46.0246	46.21	28.8866	-
Oak	190	20	3.95	528.807	63.7384	64.2463	28.5127	-
Oak	197.5	12.5	3.97	394.023	63.3046	63.684	29.9479	23
Oak	197.5	12.5	3.97	373.873	71.5367	71.9507	43.5581	23
Oak	197.5	12.5	3.97	389.703	72.5333	73.0039	39.6856	23
Oak	197.5	20	4.17	420.077	75.2837	75.6456	22.0001	-
Oak	205	12.5	4.19	386.537	63.236	63.5241	11.1148	-
Oak	205	20	4.39	320.717	66.744	67.0803	0	18
Poplar					10.5451	10.9959	7.35319	63
Poplar	190	5	3.35	4213.38	41.527	42.6103	20.0791	-
Poplar	197.5	5	3.57	6477.96	40.2307	41.0558	22.9849	46
Poplar	190	12.5	3.75	7322.45	49.2284	49.8594	33.6836	-
Poplar	205	5	3.79	4740.6	54.6826	55.8231	30.9708	-
Poplar	190	20	3.95	5169.24	52.8493	53.822	30.9391	-
Poplar	197.5	12.5	3.97	3679.5	60.5309	61.7147	38.5793	35
Poplar	197.5	12.5	3.97	4182.98	63.7303	65.1039	39.2817	35
Poplar	197.5	12.5	3.97	4280.81	59.4705	60.0769	45.6307	35
Poplar	197.5	20	4.17	922.327	58.168	58.9616	37.7112	-
Poplar	205	12.5	4.19	471.807	60.2884	61.3318	43.0363	-
Poplar	205	20	4.39	353.323	59.7537	61.2933	41.3911	28
Spruce					4.70743	4.86386	3.87821	-
Spruce	197.5	5	3.57	5056.38	21.4007	18.8682	31.848	-
Spruce	202.5	5	3.72	3707.74	23.0519	20.6297	36.4831	-
Spruce	202.5	5	3.72	4386.17	23.4974	21.3627	35.6197	-
Spruce	202.5	5	3.72	3888.07	25.3568	21.2043	45.2277	-
Spruce	207.5	5	3.86	3901.4	23.5288	23.9177	31.7058	-
Spruce	197.5	12.5	3.97	2569.87	25.4094	23.2097	44.407	-
Spruce	202.5	12.5	4.11	1392.91	33.3578	33.3839	53.9147	-
Spruce	197.5	20	4.17	528.003	19.4024	19.0265	41.1254	-
Spruce	207.5	12.5	4.26	354.133	19.2748	22.2192	36.6769	-
Spruce	202.5	20	4.32	457.657	21.1604	23.7313	39.9028	-
Spruce	207.5	20	4.47	281.853	15.8933	19.001	27.2618	-
